# Supplementary material for: Risk factors for anticoagulant-associated gastrointestinal hemorrhage: a systematic review and meta-analysis
Source: PubMed Central journal article supplement — Korean J Intern Med. 2023 Dec 8;39(1):77–85. doi: 10.3904/kjim.2023.098 (PMC10790055; doi:10.3904/kjim.2023.098), 2023-12-08
Supplement: kjim-2023-098-Supplementary-Fig.pdf [file kjim-2023-098-Supplementary-Fig.pdf]

**Supplementary Figure.** Forest plots showing the association between risk factors and GIB (from S1-S49).

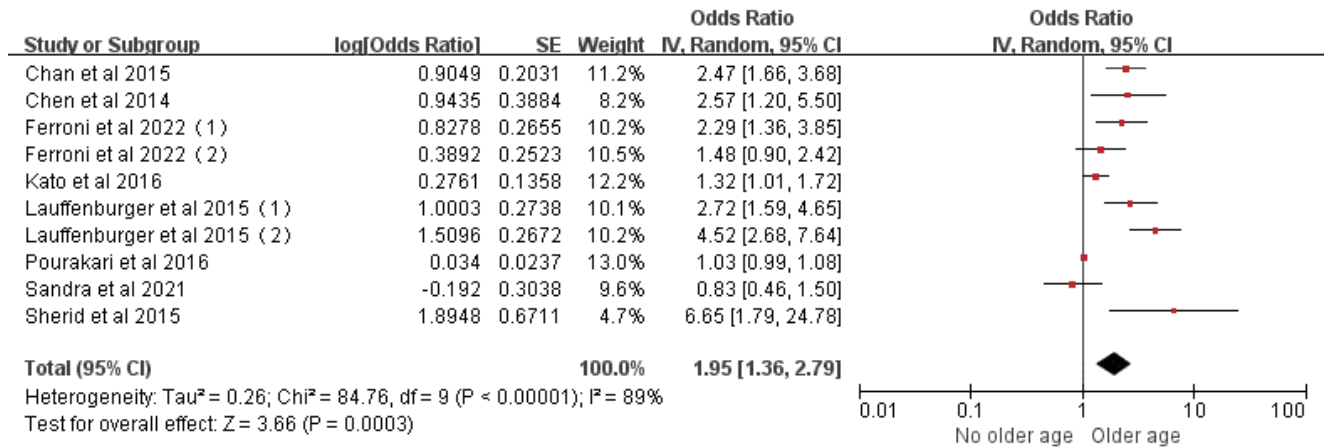

**S1.** Forest plot showing the association between older age and GIB.

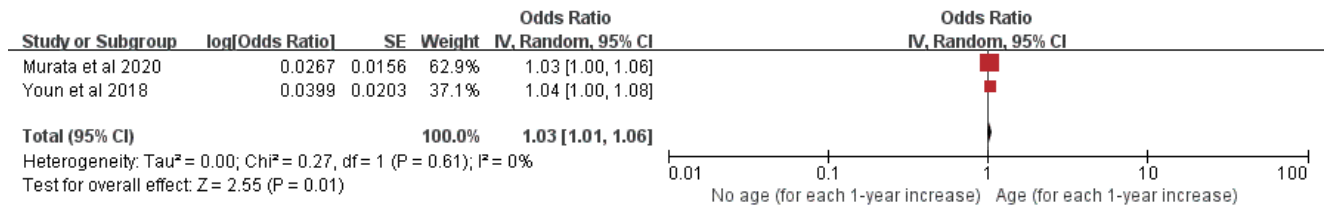

**S2.** Forest plot showing the association between age: for each 1-year increase and GIB.

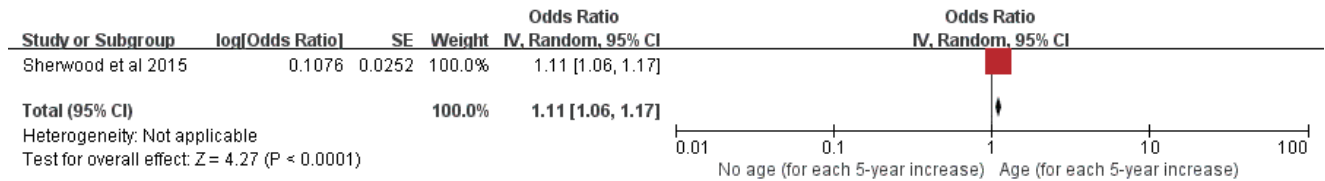

**S3.** Forest plot showing the association between age for each 5-year increase and GIB.

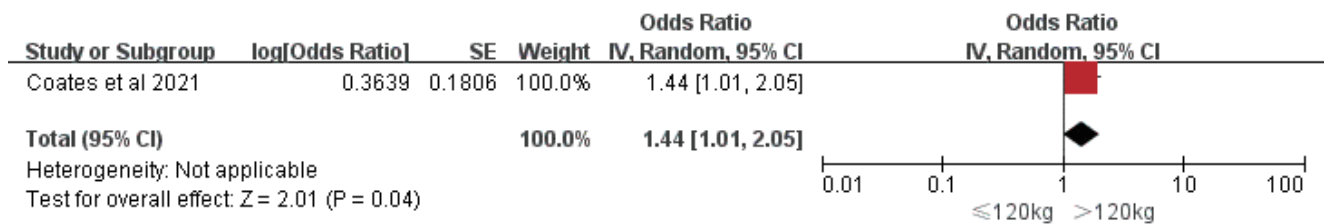

**S4.** Forest plot showing the association between obesity and GIB.

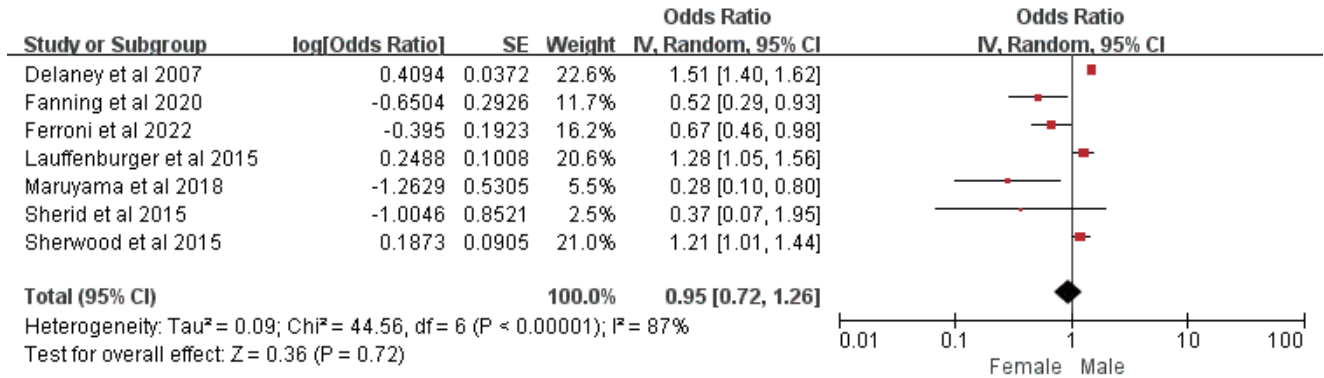

S5. Forest plot showing the association between sex and GIB.

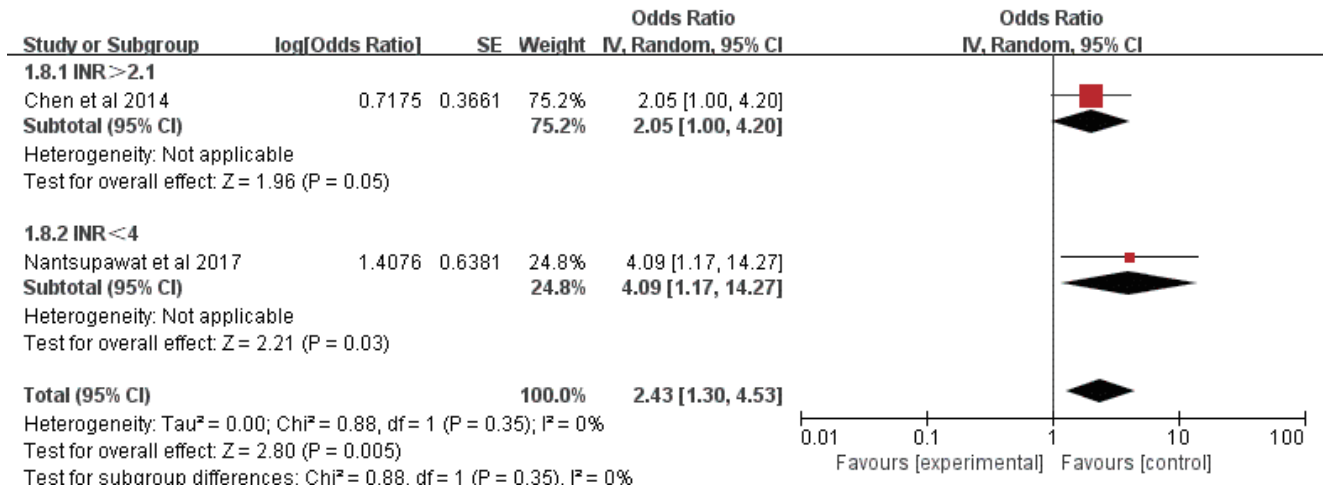

S6. Forest plot showing the association between INR and GIB.

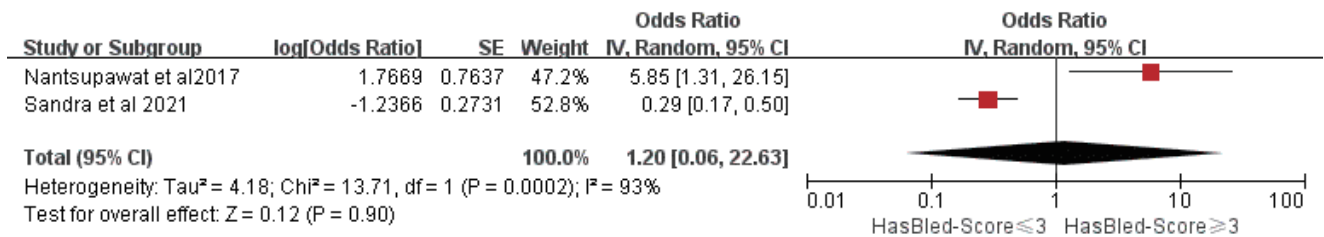

S7. Forest plot showing the association between HasBled-Score > 3 and GIB.

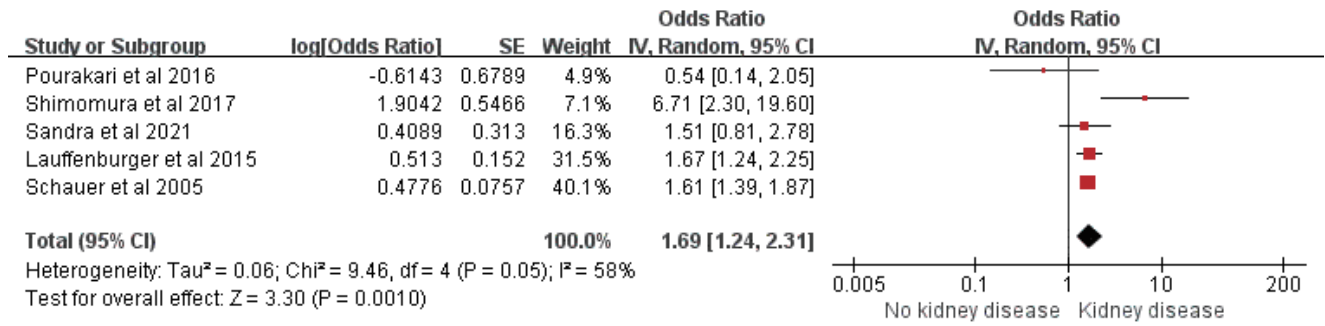

S8. Forest plot showing the association between kidney disease and GIB.

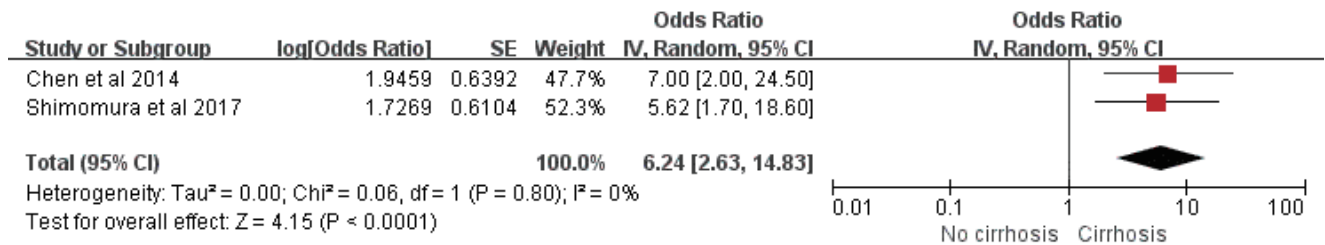

S9. Forest plot showing the association between cirrhosis and GIB.

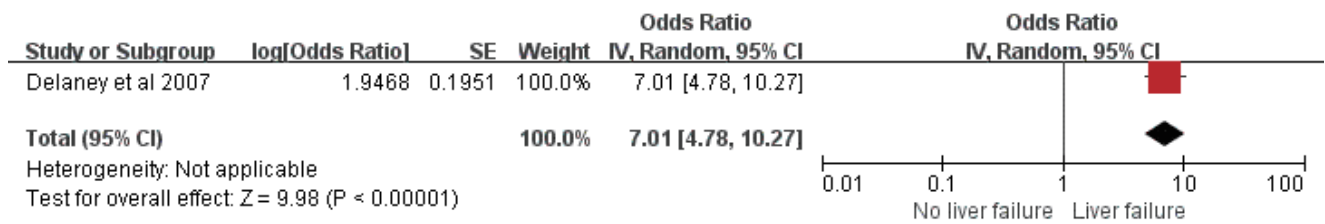

S10. Forest plot showing the association between liver failure and GIB.

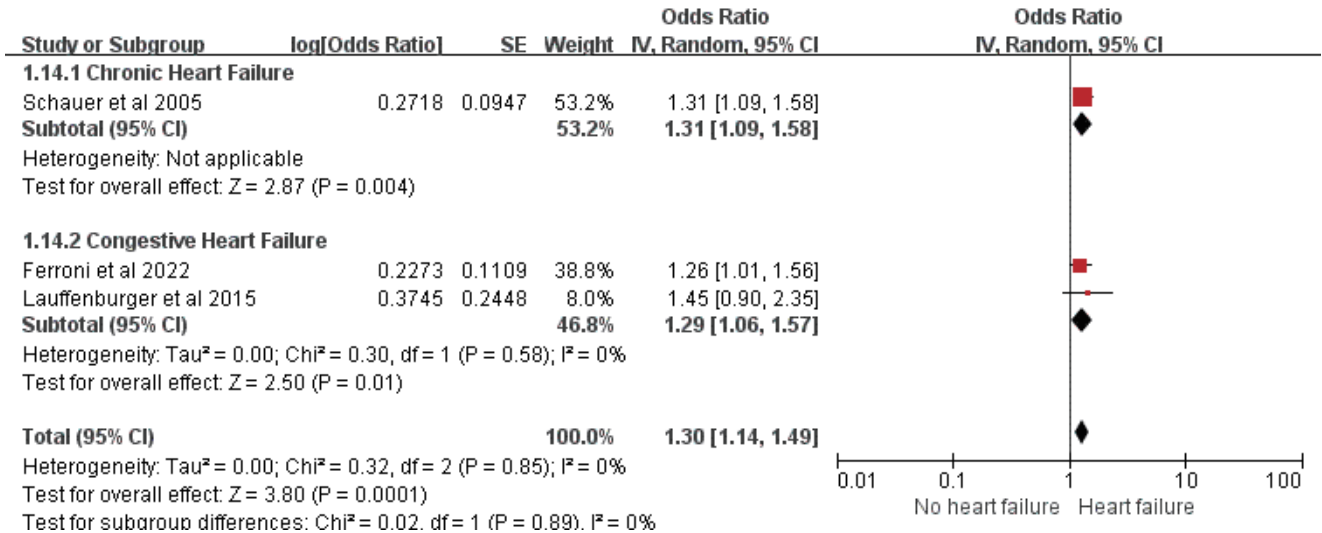

S11. Forest plot showing the association between heart failure (HF) and GIB.

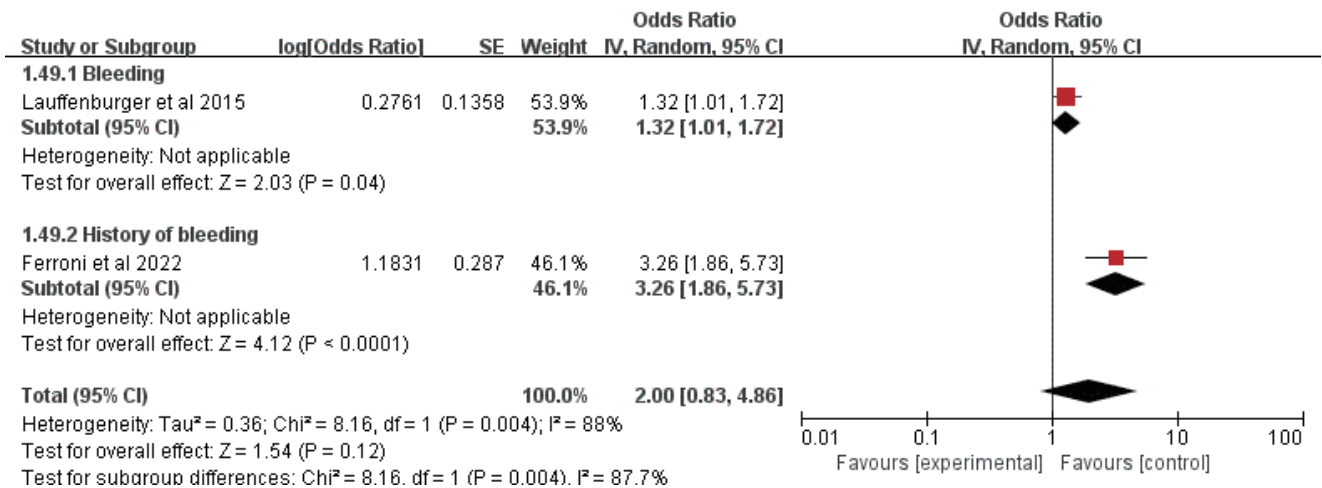

S12. Forest plot showing the association between bleeding and GIB.

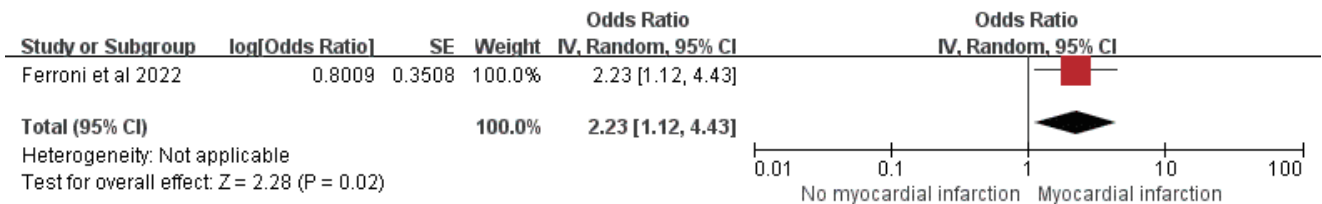

S13. Forest plot showing the association between myocardial infarction and GIB.

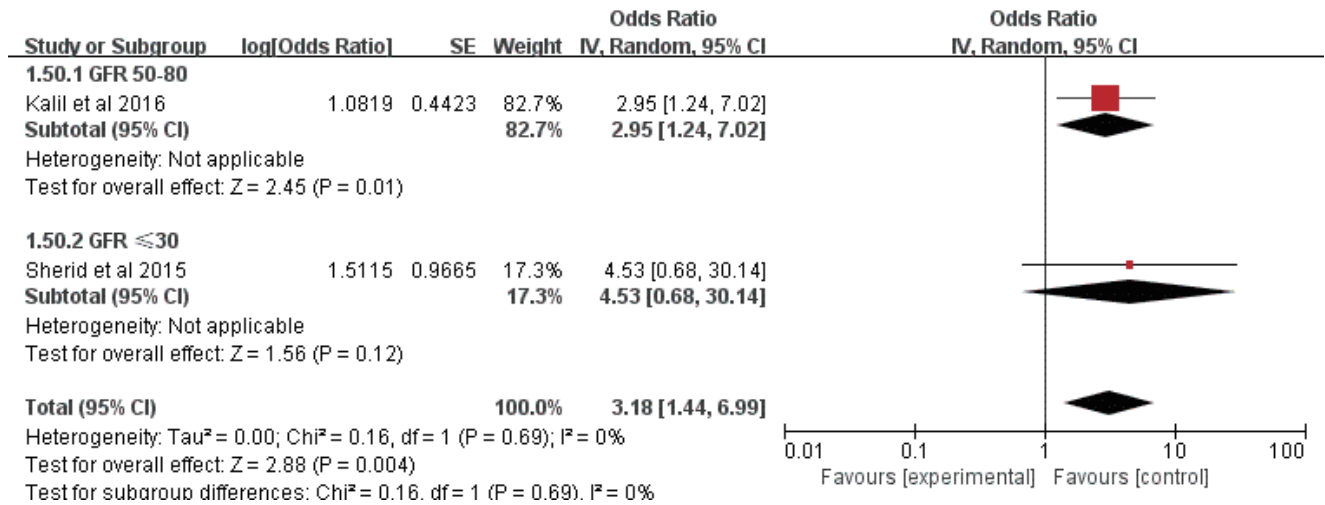

S14. Forest plot showing the association between renal failure and GIB.

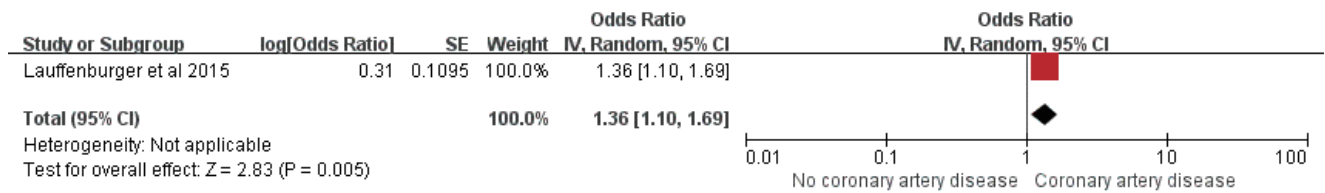

S15. Forest plot showing the association between coronary artery disease and GIB.

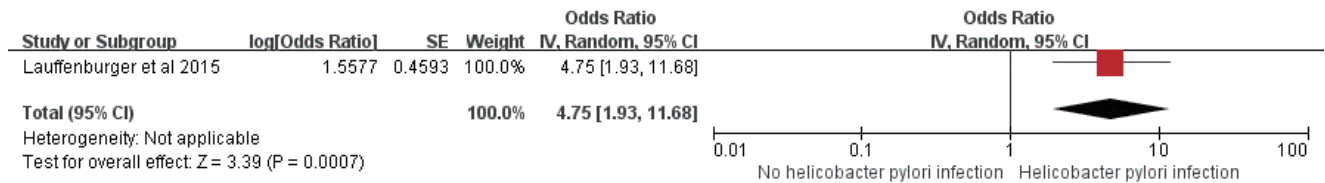

S16. Forest plot showing the association between helicobacter pylori infections and GIB.

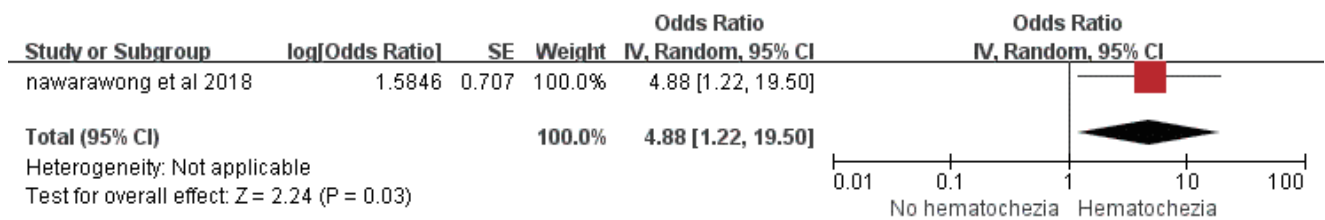

S17. Forest plot showing the association between hematochezia and GIB.

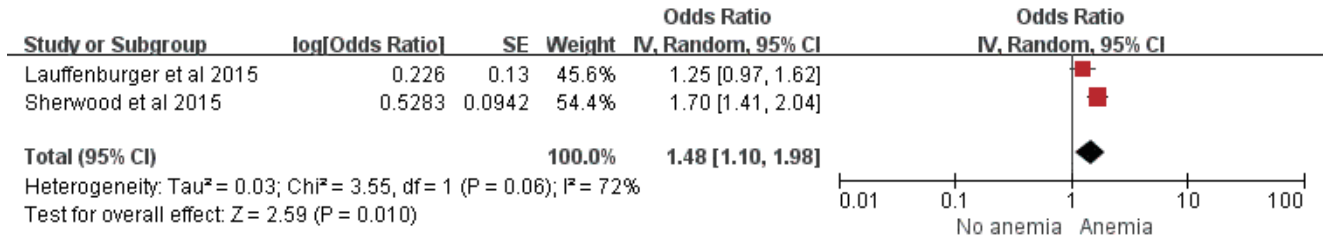

S18. Forest plot showing the association between anemia and GIB.

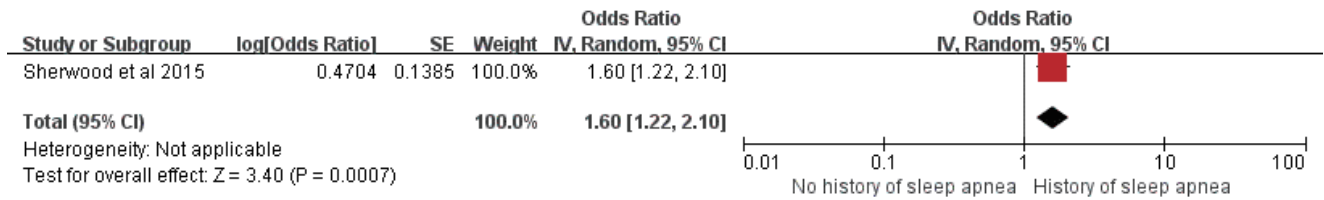

S19. Forest plot showing the association between history of sleep apnea and GIB.

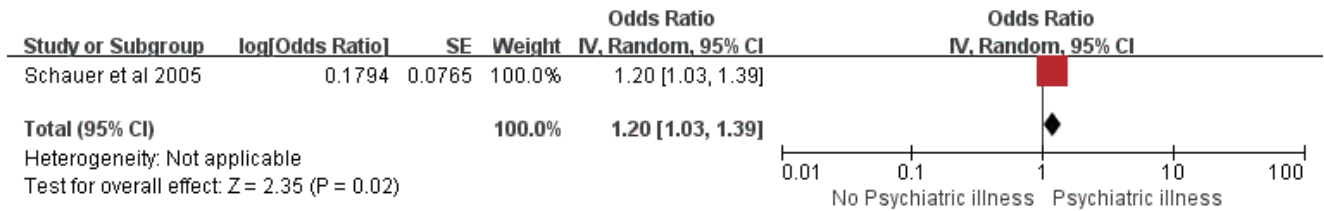

S20. Forest plot showing the association between psychiatric illness and GIB.

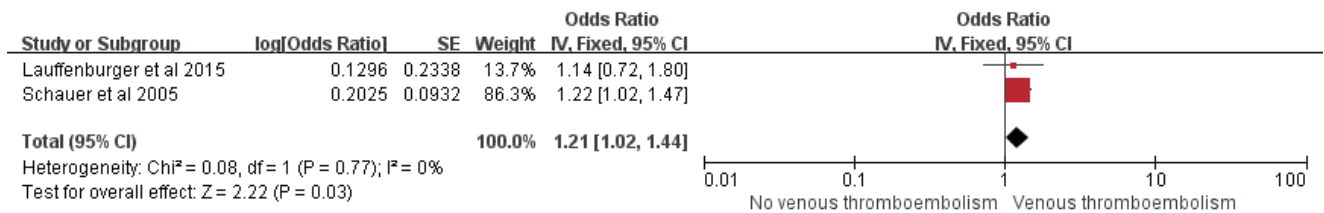

S21. Forest plot showing the association between venous thromboembolism and GIB.

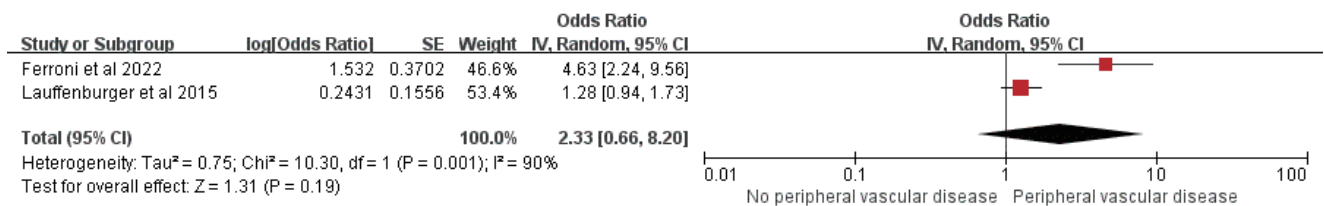

S22. Forest plot showing the association between peripheral vascular disease and GIB.

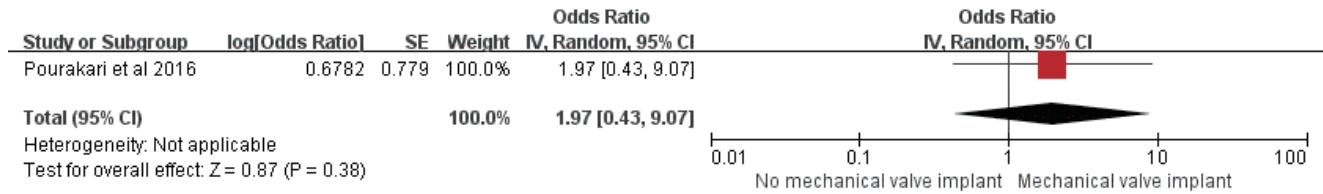

S23. Forest plot showing the association between mechanical valve implant and GIB.

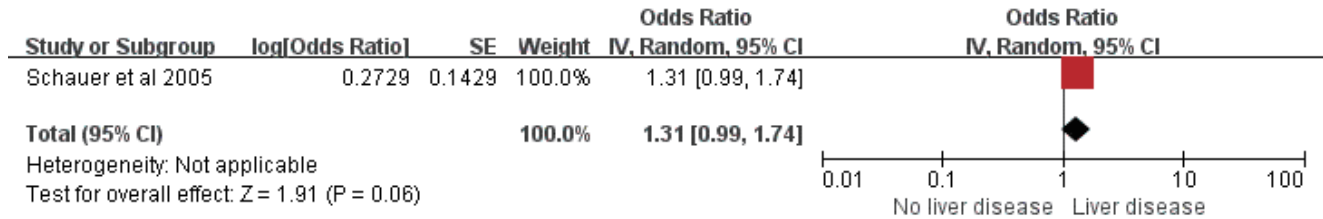

S24. Forest plot showing the association between liver disease and GIB.

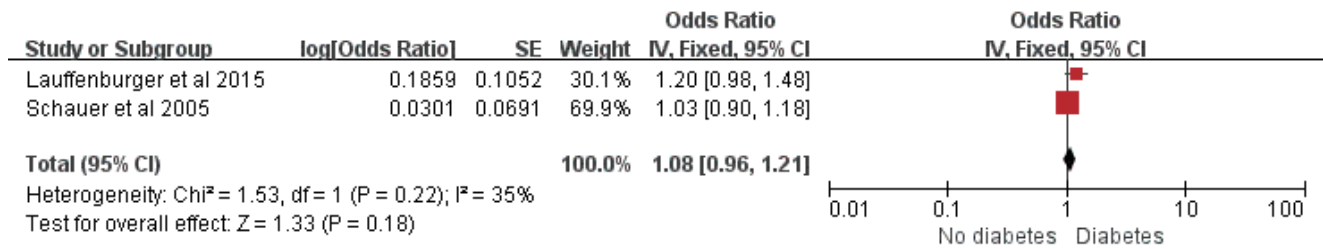

S25. Forest plot showing the association between diabetes and GIB.

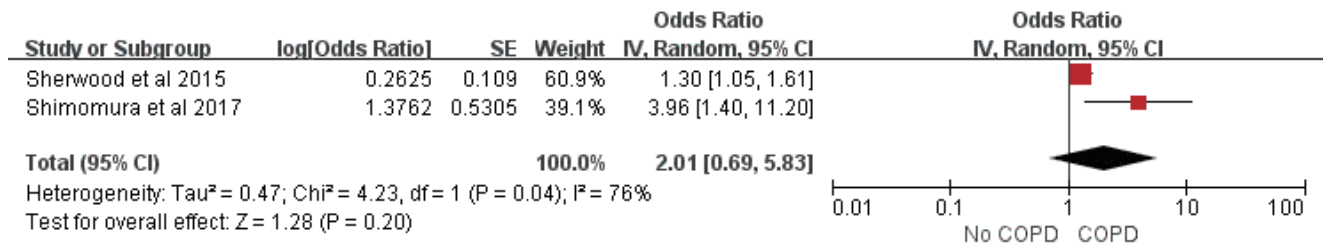

S26. Forest plot showing the association between COPD and GIB.

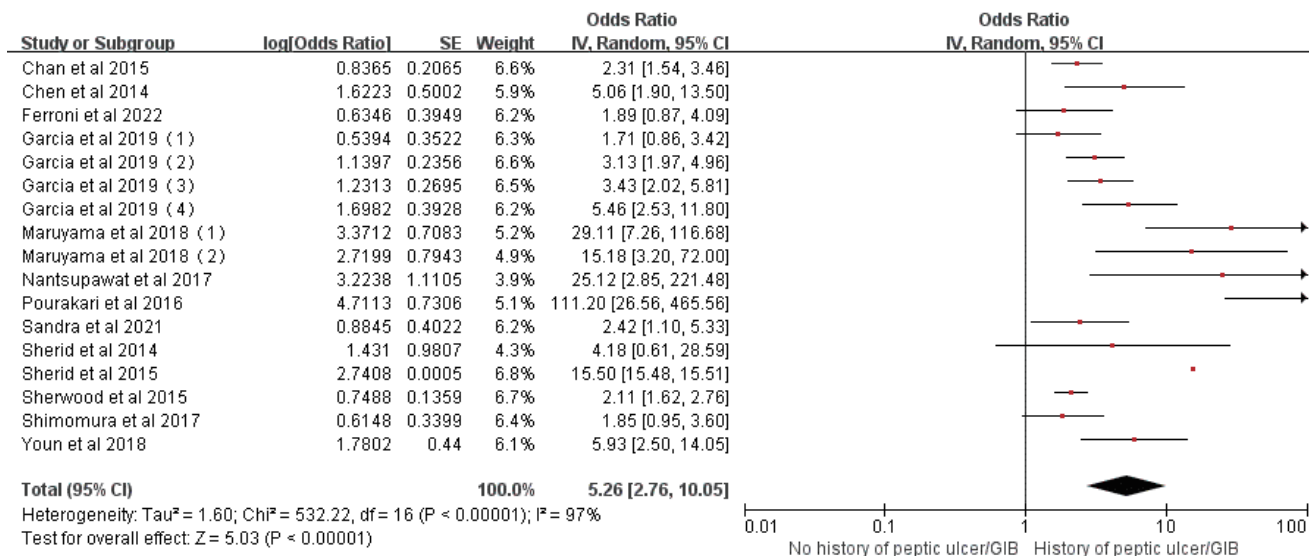

S27. Forest plot showing the association between history of peptic ulcer/GIB and GIB.

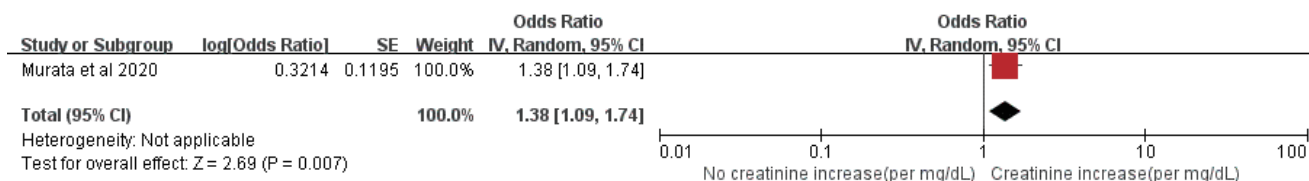

S28. Forest plot showing the association between creatinine level (per 1 mg/dL increase) and GIB.

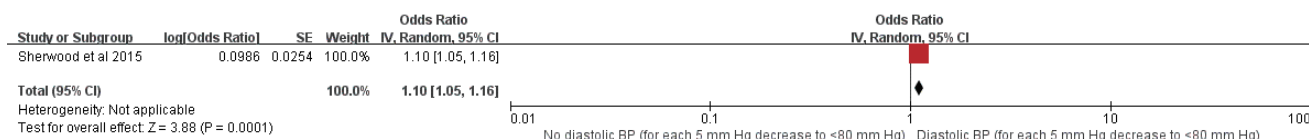

S29. Forest plot showing the association between diastolic BP and GIB.

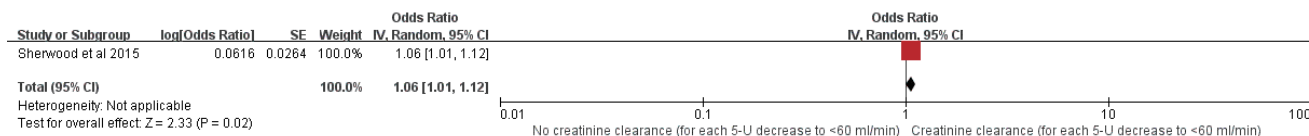

S30. Forest plot showing the association between creatinine clearance < 60 ml/min and GIB.



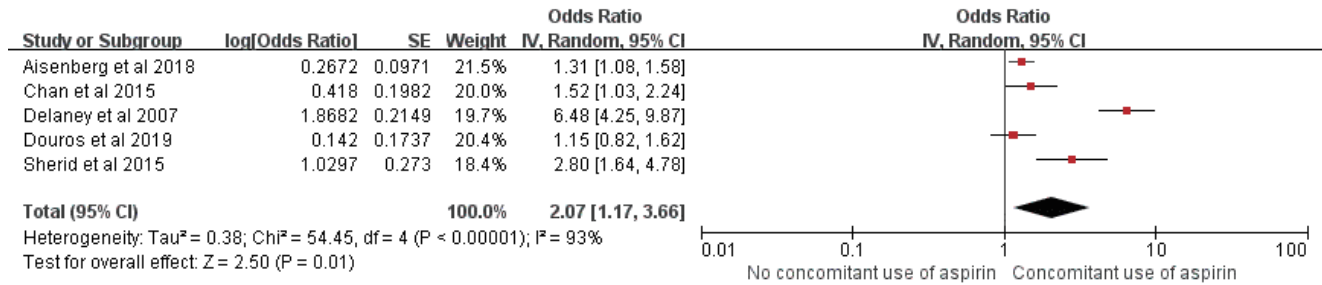

S31. Forest plot showing the association between concomitant use of aspirin and GIB.

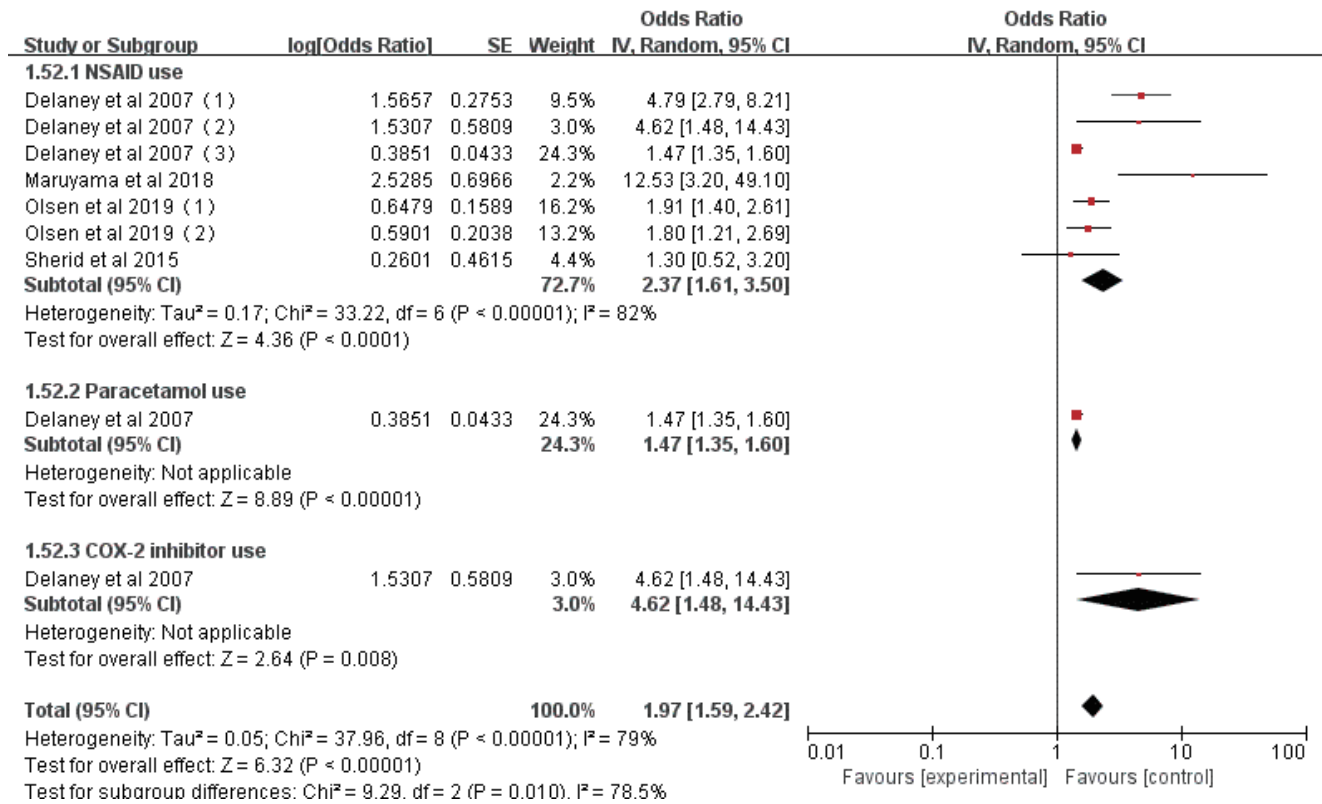

S32. Forest plot showing the association between concomitant with NSAID and GIB.

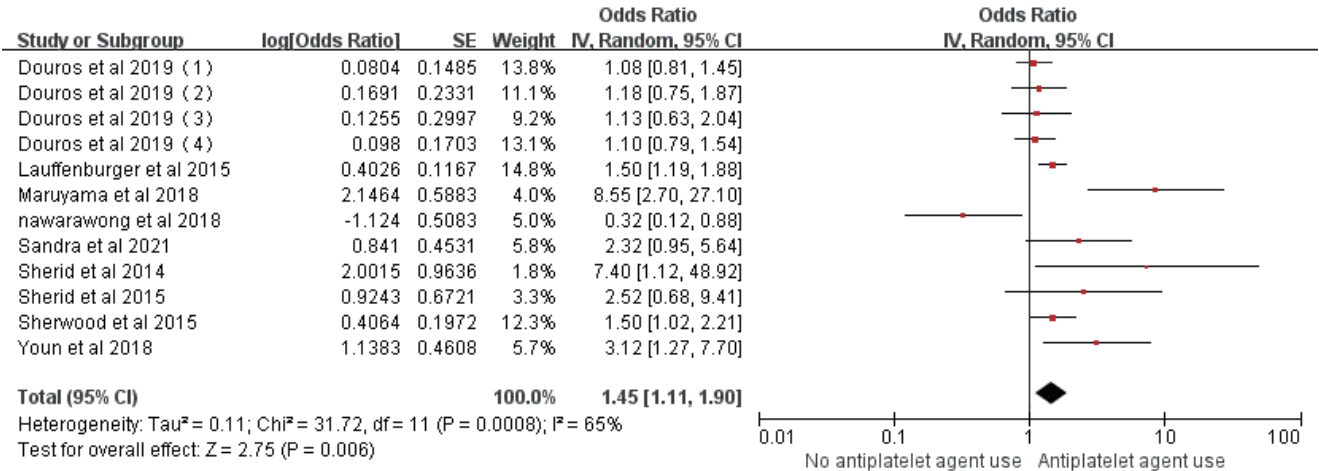

S33. Forest plot showing the association between antiplatelet therapy and GIB.

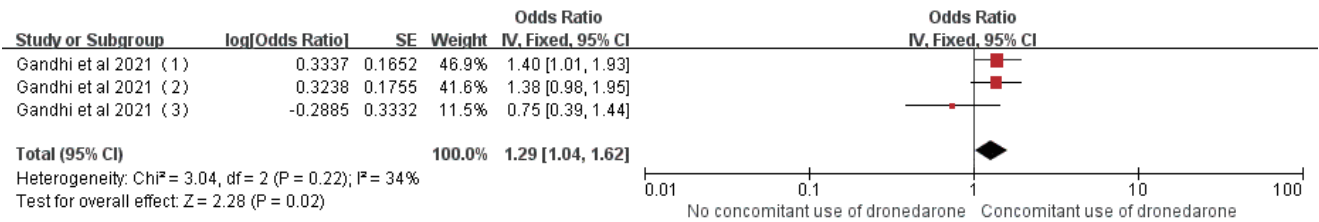

S34. Forest plot showing the association between concomitant use of dronedarone and GIB.

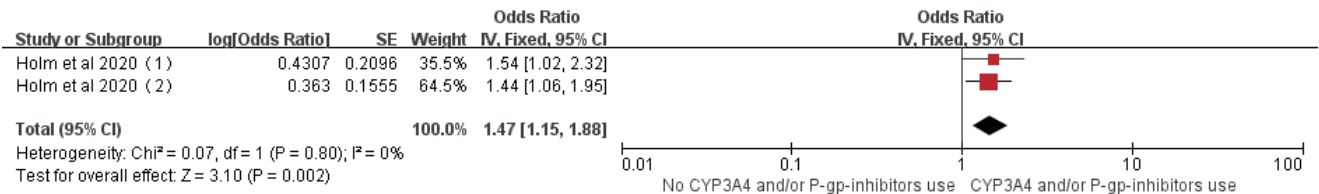

S35. Forest plot showing the association between combination of CYP3A4 and/or P-gp-inhibitors and GIB.

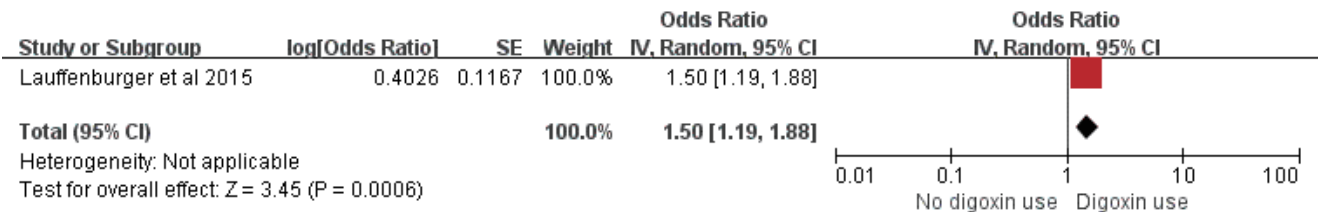

S36. Forest plot showing the association between combination of digoxin and GIB.

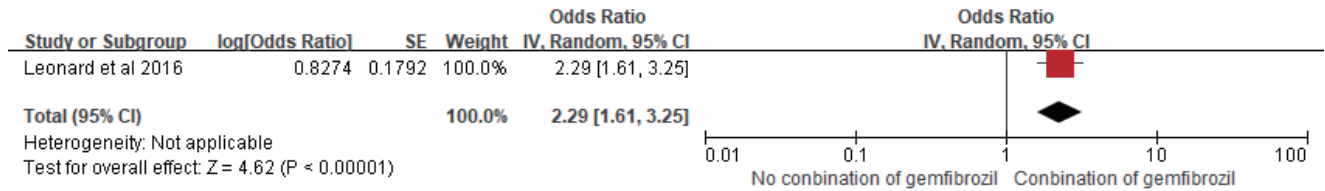

S37. Forest plot showing the association between combination of gemfibrozil and GIB.

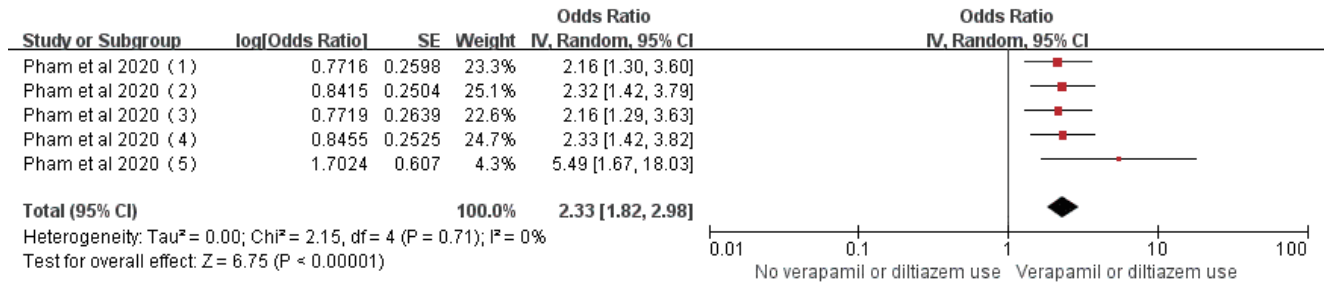

S38. Forest plot showing the association between combination of verapamil or diltiazem and GIB.

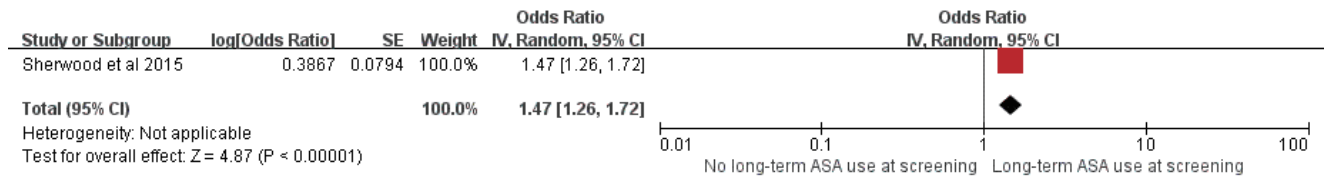

S39. Forest plot showing the association between long-term ASA use at screening and GIB.

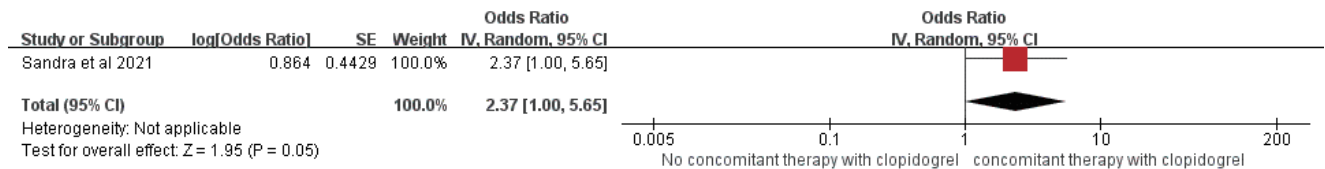

S40. Forest plot showing the association between concomitant therapy with clopidogrel and GIB.

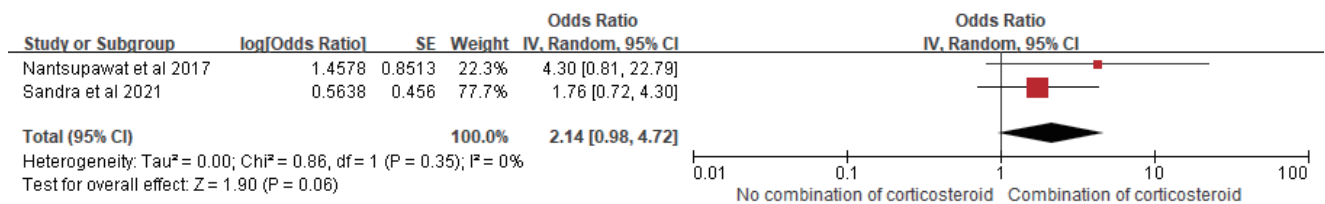

S41. Forest plot showing the association between combination of corticosteroid and GIB.

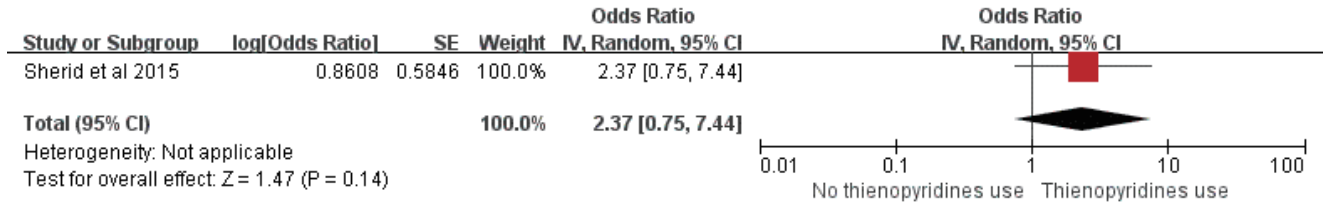

S42. Forest plot showing the association between combination of thienopyridines and GIB.

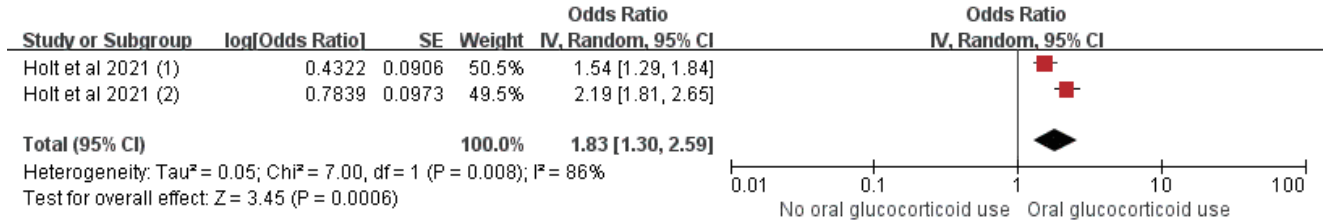

S43. Forest plot showing the association between combination of oral glucocorticoid and GIB.

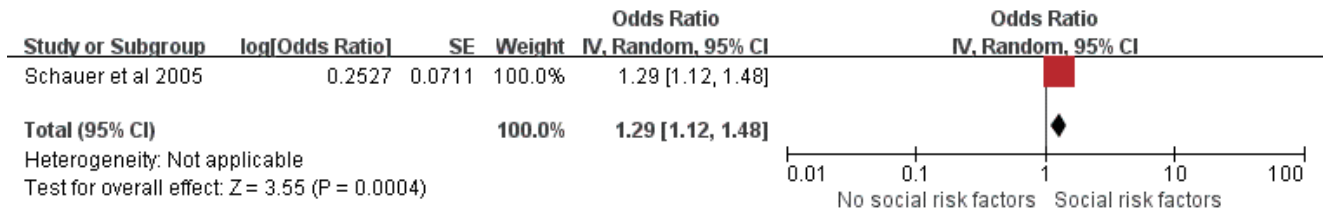

S44. Forest plot showing the association between social risk factors and GIB.

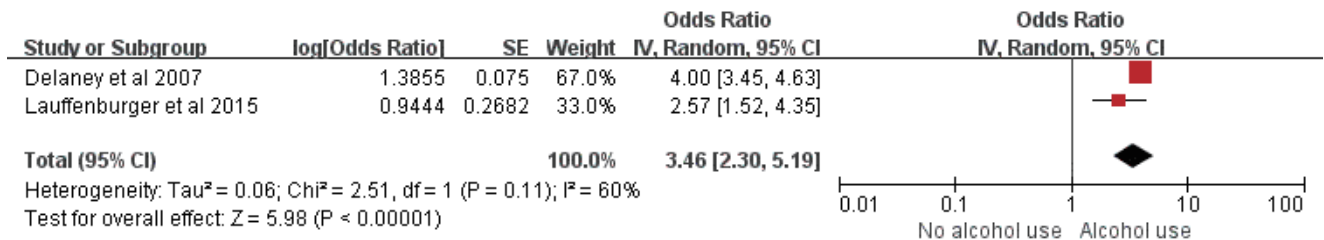

S45. Forest plot showing the association between alcohol use and GIB.

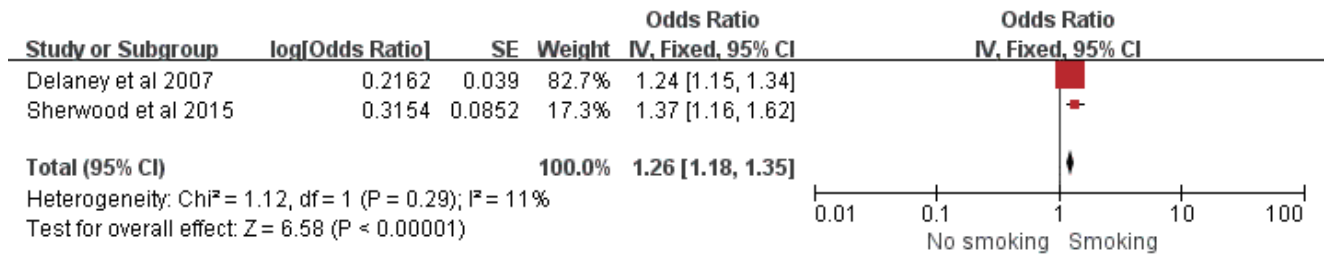

S46. Forest plot showing the association between smoking and GIB.

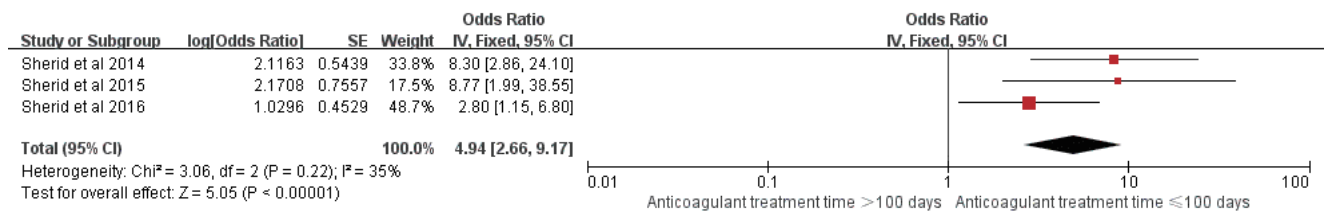

S47. Forest plot showing the association between anticoagulant treatment time  $\leq 100$  days and GIB.

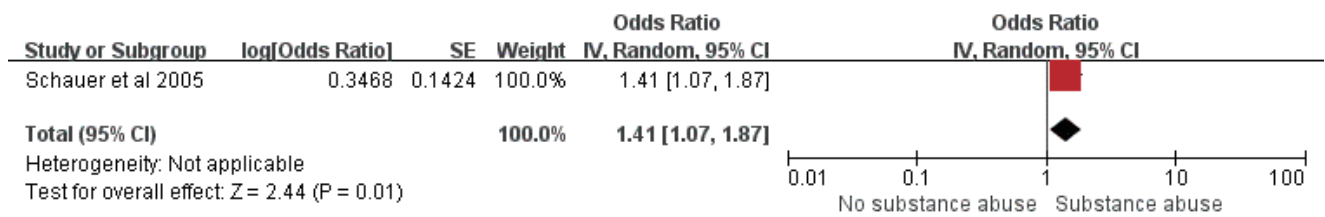

S48. Forest plot showing the association between substance abuse and GIB.

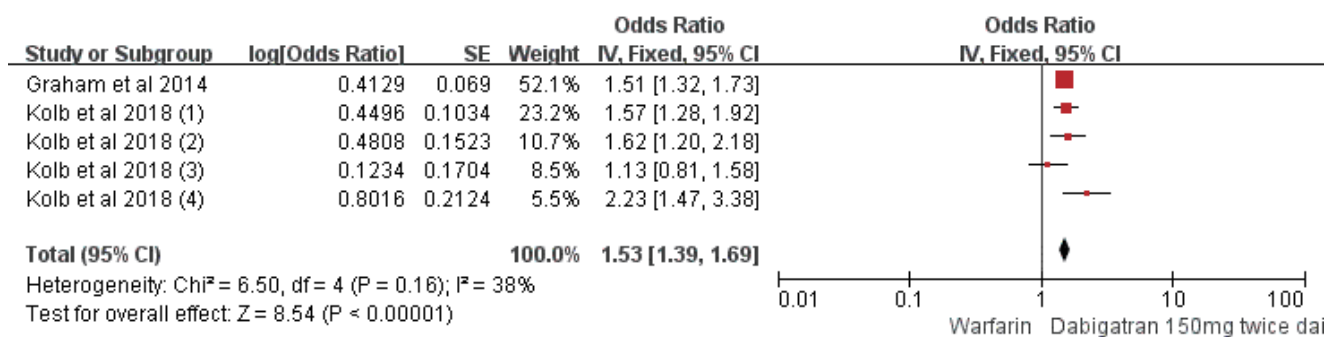

S49. Forest plot showing the association between dabigatran 150mg and GIB.
