# Supplementary material for: Risk factors for anticoagulant-associated gastrointestinal hemorrhage: a systematic review and meta-analysis
Source: PubMed Central journal article supplement — Korean J Intern Med. 2023 Dec 8;39(1):77–85. doi: 10.3904/kjim.2023.098 (PMC10790055; doi:10.3904/kjim.2023.098), 2023-12-08
Supplement: kjim-2023-098-Supplementary-Table-1.pdf [file kjim-2023-098-Supplementary-Table-1.pdf]

Supplementary Table 1. Baseline table

| Reference                         | Age (yr), Mean $\pm$ SD (range)                   | Sex, male, n (%)                         | Drug                                     | Population       | Sample size                   | Time                                | Study design               | Number of GIB                        | Risk factor                                                                                                                                                                                                                                                                                                                                                                                                                                                                                                                                                                                                                            |
|-----------------------------------|---------------------------------------------------|------------------------------------------|------------------------------------------|------------------|-------------------------------|-------------------------------------|----------------------------|--------------------------------------|----------------------------------------------------------------------------------------------------------------------------------------------------------------------------------------------------------------------------------------------------------------------------------------------------------------------------------------------------------------------------------------------------------------------------------------------------------------------------------------------------------------------------------------------------------------------------------------------------------------------------------------|
| Agudo-Fernández et al., 2021 [19] | 72.6 $\pm$ 14.6                                   | 639 (52.7)                               | Dabigatran<br>Rivaroxaba<br>Acenocoumaro | AF               | 1,213                         | January 1, 2012 to May 31, 2016     | Retrospective cohort study | GIB 68                               | History of gastrointestinal bleeding (OR = 2.422, 95% CI: 1.101–5.327, $p$ = 0.028); Concomitant therapy with clopidogrel (OR = 2.373, 95% CI: 0.996–5.652, $p$ = 0.051); HasBled-Score (OR = 0.291, 95% CI: 0.170–0.496, $p$ = 0.000) Age (OR = 0.825, 95% CI: 0.455–1.497, $p$ = 0.527); Anticoagulant therapy (OR = 0.886, 95% CI: 0.591–1.330, $p$ = 0.561); Chronic kidney disease (OR = 1.505, 95% CI: 0.815–2.780, $p$ = 0.191); Other antiplatelet (OR = 4.497, 95% CI: 0.954–5.635, $p$ = 0.242); Corticosteroids (OR = 1.757, 95% CI: 0.719–4.295, $p$ = 0.216); Chads2-Score (OR = 0.765, 95% CI: 0.337–1.739, $p$ = 0.523) |
| Fanning et al., 2020 [20]         | Median age<br>CDARS: 78<br>THIN: 74               | CDARS 14,492 (50)<br>THIN 6,172 (53)     | Aspirin<br>Rivaroxaban                   | AF <sup>a)</sup> | CDARS: 29,213<br>THIN: 11,549 | CDARS: 2010–2018<br>THIN: 2011–2017 | Retrospective cohort study | GIB<br>CDARS: 23,743<br>THIN: 10,111 | Rivaroxaban 20 mg/day vs. aspirin (HR = 1.57, 95% CI: 1.08–2.29); PPIs/H2RAs (HR = 1.96, 95% CI: 1.14–3.37); Women (HR = 1.91, 95% CI = 1.08–3.40, $p$ = 0.53)                                                                                                                                                                                                                                                                                                                                                                                                                                                                         |
| Graham et al., 2014 [21]          | -                                                 | 65,191 (48.5)                            | Dabigatran<br>Warfarin                   | AF <sup>a)</sup> | 134,414                       | October 19, 2010–December 31, 2012  | Retrospective cohort study | 2,715                                | Dabigatran 150 mg bid (HR = 1.51, 95% CI: 1.32–1.73)                                                                                                                                                                                                                                                                                                                                                                                                                                                                                                                                                                                   |
| Aisenberg et al., 2018 [22]       | MGIB 75.0 (68.0–79.0)<br>No MGIB 72.0 (64.0–78.0) | MGIB 382 (66.0)<br>No MGIB 12 638 (61.8) | Edoxaban<br>Warfarin                     | AF <sup>a)</sup> | 21,105                        | -                                   | RCT                        | MGIB 579                             | Concomitant aspirin intake (AHR = 1.31, 95% CI: 1.08–1.58, $p$ = 0.006)                                                                                                                                                                                                                                                                                                                                                                                                                                                                                                                                                                |

Supplementary Table 1. Continued

| Reference                   | Age (yr),<br>Mean $\pm$ SD<br>(range)            | Sex, male,<br>n (%)                         | Drug       | Population                                       | Sample size                   | Time                                 | Study design               | Number<br>of GIB | Risk factor                                                                                                                                                                                                                                                                                                                                                                                                                                                                                                                                                     |
|-----------------------------|--------------------------------------------------|---------------------------------------------|------------|--------------------------------------------------|-------------------------------|--------------------------------------|----------------------------|------------------|-----------------------------------------------------------------------------------------------------------------------------------------------------------------------------------------------------------------------------------------------------------------------------------------------------------------------------------------------------------------------------------------------------------------------------------------------------------------------------------------------------------------------------------------------------------------|
| Chan et al.,<br>2015 [23]   | 72.0 $\pm$ 10.9                                  | 2,412 (47.8)                                | Dabigatran | AF, Prophylaxis of VTE                           | 5,041                         | January 1, 2010 to December 31, 2013 | Retrospective cohort study | GIB 124          | Age $\geq$ 75 yr (IRR = 2.47, 95% CI: 1.66–3.68, $p < 0.05$ ); History of peptic ulcer/GIB (IRR = 2.31, 95% CI, 1.54–3.46, $p < 0.05$ ); Concomitant use of aspirin (IRR = 1.52, 95% CI, 1.03–2.24, $p < 0.05$ ); Gastroprotective agents (IRR = 0.52, 95% CI: 0.35–0.77, $p < 0.05$ ); Histamine type-2-receptor antagonists (IRR = 0.61, 95% CI: 0.40–0.94, $p < 0.05$ ); Proton pump inhibitors (IRR = 0.53, 95% CI: 0.31–0.91, $p < 0.05$ ); Histamine type-2-receptor antagonists Proton pump inhibitors both (IRR = 0.15, 95% CI: 0.06–0.39, $p < 0.05$ ) |
| Chen et al.,<br>2014 [24]   | 65.2 $\pm$ 16.6                                  | 234 (58)                                    | Warfarin   | DVT, AF, PE<br>Valvular replacement<br>other     | 401                           | July 1993 to May 2012                | Retrospective cohort study | GIB 36           | Age $>$ 65 yr (RR = 2.5, 95% CI: 1.2–5.5, $p = 0.02$ ); Mean INR $>$ 2.1 (RR = 2.1, 95% CI: 1.0–4.2, $p = 0.04$ ); History of GIB (RR = 5.1, 95% CI: 1.9–13.5, $p = 0.001$ ); Cirrhosis (RR = 6.9, 95% CI: 2.0–24.5, $p = 0.003$ )                                                                                                                                                                                                                                                                                                                              |
| Coates et al.,<br>2021 [25] | 63.9                                             | 70.2%                                       | Dabigatran | AF <sup>a</sup> )                                | 4,299                         | September 1, 2016–June 30, 2019      | Retrospective cohort study | GIB 73           | Weight $>$ 120 kg (AHR = 1.44, 95% CI: 1.01–2.05)                                                                                                                                                                                                                                                                                                                                                                                                                                                                                                               |
| Delaney et al., 2007 [26]   | Cases 69.3 $\pm$ 17.6<br>Control 69.1 $\pm$ 17.7 | Cases 2,171 (53.9)<br>Control 17,237 (42.9) | Warfarin   | PE, DVT<br>Stroke AF<br>Congestive heart-failure | Cases 4,028<br>Control 40,171 | January 1, 2000 to December 31, 2005 | Case-control               | GIB 4,028        | Male (ARR = 1.50, 95% CI: 1.40–1.62); Heavy alcohol use (ARR = 4.00, 95% CI: 3.45–4.63); Smoking (ARR = 1.23, 95% CI: 1.15–1.34); Acetaminophen (paracetamol) use (ARR = 1.47, 95% CI: 1.35–1.60); Liver failure (ARR = 7.00, 95% CI: 4.78–10.27); Warfarin + ASA (ARR = 6.48, 95% CI: 4.25–9.87); Warfarin + NSAID (ARR = 4.79, 95% CI: 2.79–8.21); Warfarin + COX-2 inhibitor (ARR = 4.62, 95% CI: 1.48–14.43)                                                                                                                                                |

Supplementary Table 1. Continued

| Reference                 | Age (yr), Mean $\pm$ SD (range)                                       | Sex, male, n (%)                                                      | Drug                                  | Population       | Sample size | Time                               | Study design               | Number of GIB                                             | Risk factor                                                                                                                                                                                                                                                                                                                                                                                                                                                                                                          |
|---------------------------|-----------------------------------------------------------------------|-----------------------------------------------------------------------|---------------------------------------|------------------|-------------|------------------------------------|----------------------------|-----------------------------------------------------------|----------------------------------------------------------------------------------------------------------------------------------------------------------------------------------------------------------------------------------------------------------------------------------------------------------------------------------------------------------------------------------------------------------------------------------------------------------------------------------------------------------------------|
| Douros et al., 2019 [27]  | DOAC 75.5 $\pm$ 9.1<br>VKA 78.0 $\pm$ 9.0                             | DOAC 2,819 (53.2)<br>VKA 4,709 (51.7)                                 | DOACs VKA                             | AF <sup>a)</sup> | 14,407      | January 2011 to March 2014         | Retrospective cohort study | GIB 253                                                   | Current concomitant DOAC-antiplatelet use (AHR = 1.08, 95% CI: 0.81–1.45); Current concomitant rivaroxaban-antiplatelet use (AHR = 1.18, 95% CI: 0.75–1.87); Current concomitant DOAC-ASA use (AHR = 1.15, 95% CI: 0.82–1.62); Current concomitant use of a DOAC with multiple antiplatelets (AHR = 1.13, 95% CI: 0.63–2.04); Current concomitant dabigatran-antiplatelet use (AHR = 1.10, 95% CI: 0.79–1.54)                                                                                                        |
| Ferroni et al., 2022 [28] | Male: DOAC 77.8<br>VKA 77.1<br>Female: DOAC 80.3<br>VKA 79.4          | 28,963 (48)                                                           | DOACs VKA                             | AF <sup>a)</sup> | 59,880      | July 1, 2013 to September 30, 2017 | Retrospective cohort study | -                                                         | Female (AHR = 1.48, 95% CI: 1.02–2.16, $p = 0.04$ ); > 85 (AHR = 2.28, 95% CI: 1.36–3.85, $p = 0.01$ ); 74–84 (AHR = 1.47, 95% CI: 0.90–2.42, $p = 0.121$ ); History of GI disease (AHR = 1.89, 95% CI: 0.87–4.09, $p = 0.10$ ); Congestive heart failure (AHR = 1.46, 95% CI: 0.90–2.35, $p = 0.11$ ); History of bleeding (AHR = 3.27, 95% CI: 1.86–5.73, $p < 0.01$ ); Myocardial infarction (AHR = 2.23, 95% CI: 1.12–4.43, $p = 0.03$ ); Peripheral artery disease (AHR = 4.63, 95% CI: 2.24–9.56, $p < 0.01$ ) |
| Gandhi et al., 2021 [29]  | -                                                                     | 95,583 (60.3)                                                         | Apixaban<br>Dabigatran<br>Rivaroxaban | AF <sup>a)</sup> | 158,476     | January 2007–September 2017        | Retrospective cohort study | GIB 4,290                                                 | Dabigatran + dronedarone (AHR = 1.40, 95% CI: 1.01–1.93, $p = 0.04$ ); Rivaroxaban + dronedarone (AHR = 1.39, 95% CI: 0.98–1.95, $p = 0.06$ ); Apixaban + dronedarone (AHR = 0.75, 95% CI: 0.39–1.44, $p = 0.38$ )                                                                                                                                                                                                                                                                                                   |
| Garcia et al., 2019 [30]  | Prior GI Bleed 73.5 (67.0–78.0)<br>No Prior GI Bleed 70.0 (62.0–76.0) | Female<br>Prior GI Bleed 205 (26.1)<br>No Prior GI Bleed 6,211 (35.7) | Apixaban<br>Warfarin                  | AF <sup>a)</sup> | 18,197      | -                                  | RCT ARISTOTLE Trial        | MGIB 218<br>Lower GI bleeding 97<br>Upper GI bleeding 118 | Major GI bleeding: prior lower GI bleed (HR = 1.72, 95% CI: 0.86–3.42); prior upper GI bleed (HR = 3.13, 95% CI: 1.97–4.96)<br>Upper GI bleeding: prior upper GI bleed (HR = 3.42, 95% CI: 2.02–5.81)<br>Lower GI bleeding: prior lower GI bleed (HR = 5.47, 95% CI: 2.53–11.80)                                                                                                                                                                                                                                     |

**Supplementary Table 1. Continued**

| Reference               | Age (yr), Mean $\pm$ SD (range)                                                     | Sex, male, n (%)                                                        | Drug                   | Population       | Sample size  | Time                        | Study design                | Number of GIB | Risk factor                                                                                                                                                                                                                                                                                 |
|-------------------------|-------------------------------------------------------------------------------------|-------------------------------------------------------------------------|------------------------|------------------|--------------|-----------------------------|-----------------------------|---------------|---------------------------------------------------------------------------------------------------------------------------------------------------------------------------------------------------------------------------------------------------------------------------------------------|
| Holm et al., 2020 [31]  | 72.1 $\pm$ 12.9                                                                     | 129,857 (53)                                                            | DOACs                  | AF <sup>a)</sup> | 244,597      | 2008–2017                   | Retrospective cohort study  | GIB 156,280   | Rivaroxaban: co-treatment pharmacodynamic effect (HR = 1.68, 95% CI: 1.37–2.05); CYP3A4 and/or P-gp-inhibitors (HR = 1.54, 95% CI: 1.02–2.32); Apixaban:co-treatment pharmacodynamic effect (HR = 1.51, 95% CI: 1.28–1.78); CYP3A4 and/or P-gp-inhibitors (HR = 1.44, 95% CI: 1.06–1.95)    |
| Holt et al., 2021 [32]  | Median (IQR) 75 (68–82)                                                             | 55,169 (56.1)                                                           | DOACs                  | AF <sup>a)</sup> | 98,376       | 2012–2018                   | Retrospective case-control  | GIB 4,946     | Oral glucocorticoid < 20 mg daily dose (HR = 1.54, 95% CI: 1.29–1.84); Oral glucocorticoid $\geq$ 20 mg (HR = 2.19, 95% CI: 1.81–2.65)                                                                                                                                                      |
| Kato et al., 2016 [33]  | < 65 yr: 59 (55.0–62.0)<br>65–74 yr: 70 (67.0–72.0)<br>$\geq$ 75 yr: 79 (76.0–82.0) | < 65 yr: 3,987 (73)<br>65–74 yr: 4,381 (61)<br>$\geq$ 75 yr: 4,697 (55) | Edoxaban<br>Warfarin   | AF <sup>a)</sup> | 21,105       | -                           | RCT ENGAGE AF-TIMI 48 Trial | MGIB 579      | $\geq$ 75 yr (HR = 1.32, 95% CI: 1.01–1.72)                                                                                                                                                                                                                                                 |
| Kalil et al., 2016 [34] | Dabigatran 73.74 $\pm$ 6.86<br>Warfarin 73.85 $\pm$ 6.75                            | -                                                                       | Dabigatran<br>Warfarin | AF <sup>a)</sup> | 69,467/25,74 | June 1, 2010 to December 31 | Retrospective cohort study  | GIB 35        | GFR 50–80 mL/min/1.73 m <sup>2</sup> (HR = 2.94, 95% CI: 1.24–7.02, $p$ = 0.015)                                                                                                                                                                                                            |
| Kolb et al., 2018 [35]  | -                                                                                   | -                                                                       | Dabigatran<br>Warfarin | AF <sup>a)</sup> | 18,113       | 2005–2009                   | RCT (RE-LY) Trial           | GIB 1,158     | MGIB: D150 vs. W (RR = 1.57, 95% CI: 1.28–1.92, $p$ < 0.01); Life-threatening or fatal GI bleeding: D150 vs. W (RR = 1.62, 95% CI: 1.20–2.18, $p$ < 0.01); Upper GI: D150 vs. W (RR = 1.13, 95% CI: 0.81–1.58, $p$ = 0.49); Lower GI: D150 vs. W (RR = 2.23, 95% CI: 1.47–3.38, $p$ < 0.01) |

Supplementary Table 1. Continued

| Reference                       | Age (yr),<br>Mean ± SD<br>(range) | Sex, male,<br>n (%)                                                 | Drug       | Population                              | Sample size | Time                                             | Study design                       | Number<br>of GIB                                   | Risk factor                                                                                                                                                                                                                                                                                                                                                                                                                                                                                                                                                                                                                                                                                                           |
|---------------------------------|-----------------------------------|---------------------------------------------------------------------|------------|-----------------------------------------|-------------|--------------------------------------------------|------------------------------------|----------------------------------------------------|-----------------------------------------------------------------------------------------------------------------------------------------------------------------------------------------------------------------------------------------------------------------------------------------------------------------------------------------------------------------------------------------------------------------------------------------------------------------------------------------------------------------------------------------------------------------------------------------------------------------------------------------------------------------------------------------------------------------------|
| Lauffenburger et al., 2015 [36] | 67.5 ± 12.4                       | No GIB<br>Bleeding<br>13,104<br>(63.7)<br>GI Bleeding<br>238 (53.4) | Dabigatran | AF <sup>a)</sup>                        | 21,033      | October 19,<br>2010 to De-<br>cember 31,<br>2012 | Retrospec-<br>tive cohort<br>study | GIB 446                                            | 65–74 (AHR = 2.72, 95% CI: 1.59–4.65, $p < 0.001$ ); $\geq 75$ (AHR = 4.52, 95% CI: 2.68–7.64, $p < 0.001$ ); Congestive heart failure (AHR = 1.25, 95% CI: 1.01–1.56, $p < 0.05$ ); Coronary artery disease (AHR = 1.37, 95% CI: 1.10–1.69, $p < 0.05$ ); Renal impairment (AHR = 1.67, 95% CI: 1.24–2.25, $p < 0.001$ ); Bleeding (AHR = 1.32, 95% CI: 1.01–1.72, $p < 0.05$ ); Alcohol abuse (AHR = 2.57, 95% CI: 1.52–4.35, $p < 0.001$ ); <i>Helicobacter pylori</i> infection (AHR = 4.75, 95% CI: 1.93–11.68, $p < 0.05$ ); Anti-platelet agent (AHR = 1.49, 95% CI: 1.19–1.88, $p < 0.001$ ); Male sex (AHR = 0.78, 95% CI: 0.64–0.95, $p < 0.05$ ); Digoxin use (AHR = 1.49, 95% CI: 1.19–1.88, $p < 0.05$ ) |
| Lee et al., 2021 [37]           | 71.3 ± 10.0                       | 25,868<br>(59.9)                                                    | DOACs      | AF <sup>a)</sup>                        | 43,173      | January 2015<br>to Decem-<br>ber 2017            | Retrospec-<br>tive cohort<br>study | Hospital-<br>ization of<br>GIB 314                 | BMI $\geq 30$ kg/m <sup>2</sup> (AHR = 0.810, 95% CI: 0.494–1.328, $p = 0.018$ ); BMI per 5 kg/m <sup>2</sup> increase (AHR = 0.785, 95% CI: 0.658–0.937, $p = 0.007$ )                                                                                                                                                                                                                                                                                                                                                                                                                                                                                                                                               |
| Leonard et al., 2016 [38]       | Mean age 71                       | 87,576 (37)                                                         | Warfarin   | AF, VTE<br>Valvular<br>heart<br>disease | 236,691     | 1999–2011                                        | Cohort                             | GIB 2,035                                          | Warfarin + gemfibrozil (AHR = 2.29, 95% CI: 1.61–3.25)                                                                                                                                                                                                                                                                                                                                                                                                                                                                                                                                                                                                                                                                |
| Maruyama et al., 2018 [39]      | 72.2 ± 10.0                       | 448 (68.1)                                                          | DOACs      | AF <sup>a)</sup>                        | 658         | April 2011–<br>November<br>2015                  | Cohort                             | GIB 27:<br>Upper GI 9<br>Lower GI<br>18<br>MGIB 12 | Upper gastrointestinal bleeding: PPI (AHR = 0, 95% CI: 0–2E + 134, $p < 0.001$ ); Past digestive ulcer (AHR = 29.114, 95% CI: 7.265–116.678, $p < 0.001$ ); Lower gastrointestinal bleeding: NSAIDs (AHR = 12.6, 95% CI: 3.2–49.1, $p < 0.001$ ); Dual antiplatelet (AHR = 8.6, 95% CI: 2.7–27.1, $p < 0.001$ ); Past GIB (AHR = 15.1, 95% CI: 3.2–72.0, $p = 0.001$ ); Female (AHR = 3.2, 95% CI: 0.1–0.8, $p = 0.019$ )                                                                                                                                                                                                                                                                                             |

Supplementary Table 1. Continued

| Reference                     | Age (yr), Mean $\pm$ SD (range)                   | Sex, male, n (%) | Drug                      | Population                                               | Sample size | Time                              | Study design               | Number of GIB | Risk factor                                                                                                                                                                                                                                                                                                                                                                                                                                                                                                                                                              |
|-------------------------------|---------------------------------------------------|------------------|---------------------------|----------------------------------------------------------|-------------|-----------------------------------|----------------------------|---------------|--------------------------------------------------------------------------------------------------------------------------------------------------------------------------------------------------------------------------------------------------------------------------------------------------------------------------------------------------------------------------------------------------------------------------------------------------------------------------------------------------------------------------------------------------------------------------|
| Murata et al., 2020 [40]      | Warfarin<br>72.2 $\pm$ 9.3<br>DOAC 71.8 $\pm$ 9.5 | 2,390 (74)       | Warfarin, DOACs           | AF <sup>a)</sup>                                         | 3,237       | 2013–2015                         | Prospective cohort         | GIB 68        | Creatinine (per mg/dL increase) (AHR = 1.379, 95% CI: 1.091–1.743, $p$ = 0.007); Age (per year increase) (AHR = 1.027, 95% CI: 0.996–1.059, $p$ = 0.86); Hemoglobin (per g/dL) (AHR = 0.814, 95% CI: 0.705–0.941, $p$ = 0.005)                                                                                                                                                                                                                                                                                                                                           |
| Nantsupawat et al., 2017 [41] | Mean age<br>72.2                                  | 128 (51.8)       | Dabigatran                | AF <sup>a)</sup>                                         | 247         | 2010–2013                         | Retrospective cohort study | GIB 10        | History of GIB (OR = 25.14, 95% CI: 2.85–221.47, $p$ < 0.01); HAS-BLED $\geq$ 3 (OR = 5.85, 95% CI: 1.31–26.15, $p$ = 0.021); Corticosteroid use (OR = 4.30, 95% CI: 0.81–22.79, $p$ = 0.087)                                                                                                                                                                                                                                                                                                                                                                            |
| Nawarawong et al., 2018 [42]  | 71.6 $\pm$ 10.8                                   | 47 (50)          | Warfarin, UFH, LMWH, NOAC | AF, vascular thrombosis, Stroke, Valvular heart diseases | 94          | October 2010 to February 2013     | Retrospective cohort study | Acute GIB 94  | Hematochezia (OR = 4.90, 95% CI: 1.22–19.50, $p$ = 0.024); INR < 4 (OR = 4.07, 95% CI: 1.17–14.27, $p$ = 0.028); Concomitant antiplatelets (OR = 0.32, 95% CI: 0.12–0.88, $p$ = 0.027)                                                                                                                                                                                                                                                                                                                                                                                   |
| Olsen et al., 2019 [43]       | Moderate age 70 (IQR 64–78)                       | 22,651 (55)      | VKA DOACs                 | AF <sup>a)</sup>                                         | 41,183      | January 1, 2012–December 31, 2015 | Retrospective cohort study | GIB 1,642     | NSAIDs + NOAC vs. NOAC (HR = 2.01, 95% CI: 1.40–2.61); NSAIDs + VKA vs. VKA (HR = 1.95, 95% CI: 1.21–2.69); NSAIDs + apixaban vs. apixaban (HR = 2.98, 95% CI: 1.82–4.87); NSAIDs + rivaroxaban vs. rivaroxaban (HR = 1.94, 95% CI: 1.06–3.55); NSAIDs + dabigatran vs. dabigatran (HR = 1.52, 95% CI: 0.92–2.50)                                                                                                                                                                                                                                                        |
| Pham et al., 2020 [44]        | -                                                 | -                | DOACs                     | AF <sup>a)</sup>                                         | 48,442      | October 19, 2010 to June 30, 2015 | Retrospective cohort study | GIB 687       | Overall GI bleeding: dabigatran with verapamil or diltiazem vs amlodipine (AHR = 2.16, 95% CI: 1.30–3.60, $p$ < 0.05); dabigatran + verapamil or diltiazem vs. metoprolol (AHR = 2.32, 95% CI: 1.42–3.79, $p$ < 0.05); GI minor bleeding: dabigatran with verapamil or diltiazem vs. amlodipine (AHR = 2.16, 95% CI: 1.29–3.63, $p$ < 0.05); dabigatran + verapamil or diltiazem vs. metoprolol (AHR = 2.33, 95% CI: 1.42–3.82, $p$ < 0.05); Major/moderate GI bleeding: dabigatran + verapamil or diltiazem vs. metoprolol (AHR = 5.49, 95% CI: 1.67–18.03, $p$ < 0.05) |

Supplementary Table 1. Continued

| Reference                   | Age (yr), Mean $\pm$ SD (range)                               | Sex, male, n (%)                            | Drug                   | Population                                    | Sample size | Time                            | Study design               | Number of GIB | Risk factor                                                                                                                                                                                                                                                                                                                                                                                                                                                                                                                                                                                                                                                                                                                                                                                |
|-----------------------------|---------------------------------------------------------------|---------------------------------------------|------------------------|-----------------------------------------------|-------------|---------------------------------|----------------------------|---------------|--------------------------------------------------------------------------------------------------------------------------------------------------------------------------------------------------------------------------------------------------------------------------------------------------------------------------------------------------------------------------------------------------------------------------------------------------------------------------------------------------------------------------------------------------------------------------------------------------------------------------------------------------------------------------------------------------------------------------------------------------------------------------------------------|
| Pourakari et al., 2016 [45] | No GI bleeding 63.8 $\pm$ 16.8<br>GI bleeding 68.6 $\pm$ 13.1 | 121 (43.5)                                  | Warfarin               | AF, DVT, Mechanical heart, Valve implantation | 278         | 2003–2015                       | Retrospective cohort study | UGIB 41       | History of peptic ulcer (HR = 111.19, 95% CI: 26.56–465.56, $p < 0.001$ ); Older age (HR = 1.032, 95% CI: 0.985–1.081, $p = 0.183$ ); Mechanical valve implant (HR = 1.971, 95% CI: 0.428–9.070, $p = 0.384$ ); Chronic kidney disease (HR = 0.542, 95% CI: 0.143–2.047, $p = 0.366$ )                                                                                                                                                                                                                                                                                                                                                                                                                                                                                                     |
| Schauer et al., 2005 [46]   | 73 $\pm$ 13.8                                                 | 2,974 (31.8)                                | Warfarin               | AF <sup>a</sup>                               | 9,345       | January 1, 1997 to May 31, 2002 | Retrospective cohort study | GIB 864       | Substance abuse (AHR = 1.41, 95% CI: 1.07–1.87); Psychiatric illness (AHR = 1.19, 95% CI: 1.03–1.39); Social risk factors (AHR = 1.28, 95% CI: 1.12–1.48); Chronic heart failure (AHR = 1.31, 95% CI: 1.09–1.58); Liver disease (AHR = 1.31, 95% CI: 0.99–1.74); Renal disease (AHR = 1.61, 95% CI: 1.39–1.87); Deep vein thrombosis (AHR = 1.22, 95% CI: 1.02–1.47); Diabetes mellitus (AHR = 1.03, 95% CI: 0.90–1.18); Refill time 432 d (AHR = 0.79, 95% CI: 0.69–0.91)                                                                                                                                                                                                                                                                                                                 |
| Sherid et al., 2015 [47]    | Dabigatran 72.72<br>Warfarin 71.83                            | Dabigatran 104 (50.0)<br>Warfarin 96 (45.9) | Dabigatran<br>Warfarin | AF, DVT, PE<br>Portal venous thrombosis       | 417         | 2010–2012                       | Retrospective cohort study | GIB 31        | Dabigatran group: duration < 100 days (AOR = 8.176, 95% CI: 1.993–38.547, $p = 0.0007$ ); Age > 65 yr (AOR = 2.989, 95% CI: 1.785–24.782, $p = 0.0453$ ); Previous GI bleeding (AOR = 6.284, 95% CI: 0.612–28.591, $p = 0.036$ ); Sex (female) (AOR = 2.732, 95% CI: 0.514–14.509, $p = 0.238$ ); Race (Caucasian) (AOR = 0.612, 95% CI: 1.33–2.816, $p = 0.528$ ); GFR $\leq 30$ mL/min/1.73 m <sup>2</sup> (AOR = 4.534, 95% CI: 0.682–30.138, $p = 0.118$ ); Concomitant with aspirin (AOR = 1.739, 95% CI: 1.64–4.781, $p = 0.657$ ); Concomitant with thienopyridines (AOR = 1.051, 95% CI: 0.752–7.438, $p = 0.279$ ); Concomitant with dual antiplatelet (AOR = 0.856, 95% CI: 0.675–9.409, $p = 0.492$ ); Concomitant with NSAIDs (AOR = 1.297, 95% CI: 1.824–5.721, $p = 0.573$ ) |

Supplementary Table 1. Continued

| Reference                        | Age (yr),<br>Mean ± SD<br>(range)                                 | Sex, male,<br>n (%)                                              | Drug                      | Population                                      | Sample size | Time      | Study design                       | Number<br>of GIB | Risk factor                                                                                                                                                                                                                                                                                                                                                                                                                                                                                                                                                                                                                                                                                                                                                                                                                                                                                                                                                                                                                                  |
|----------------------------------|-------------------------------------------------------------------|------------------------------------------------------------------|---------------------------|-------------------------------------------------|-------------|-----------|------------------------------------|------------------|----------------------------------------------------------------------------------------------------------------------------------------------------------------------------------------------------------------------------------------------------------------------------------------------------------------------------------------------------------------------------------------------------------------------------------------------------------------------------------------------------------------------------------------------------------------------------------------------------------------------------------------------------------------------------------------------------------------------------------------------------------------------------------------------------------------------------------------------------------------------------------------------------------------------------------------------------------------------------------------------------------------------------------------------|
| Sherid et al.,<br>2014 [48]      | Rivaroxaban<br>68.25 ±<br>14.97<br>Dabigatran<br>72.71 ±<br>12.37 | Rivarox-<br>aban 70<br>(47.62)<br>Dabiga-<br>tran 114<br>(50.22) | Rivaroxaban<br>Dabigatran | AF<br>VTE treat-<br>ment<br>VTE pro-<br>phylaxi | 374         | 2010–2013 | Retrospec-<br>tive cohort<br>study | GIB 19           | Rivaroxaban group: ≤ 40 days vs. > 40 days<br>(OR = 2.8, <i>p</i> = 0.023); DAPT with rivaroxaban<br>(OR = 7.4, <i>p</i> = 0.0378); Prior GI bleeding (OR<br>= 15.5, <i>p</i> = 0.0002); Dabigatran group:dabiga-<br>tran for ≤ 40 days when compared to ≥ 40<br>days (OR = 8.3, <i>p</i> < 0.0001)                                                                                                                                                                                                                                                                                                                                                                                                                                                                                                                                                                                                                                                                                                                                          |
| Sherid et al.,<br>2016 [49]      | Rivaroxaban<br>68.25 ±<br>14.97<br>Warfarin<br>71.35 ±<br>13.09   | Rivarox-<br>aban 70<br>(47.62)<br>Warfarin 70<br>(45.75)         | Rivaroxaban<br>Warfarin   | AF<br>VTE treat-<br>ment<br>VTE pro-<br>phylaxi | 300         | 2011–2013 | Retrospec-<br>tive cohort<br>study | GIB 22           | Rivaroxaban group: ≤ 40 days vs. > 40 days (OR<br>= 2.8, <i>p</i> = 0.023); DAPT with rivaroxaban (OR<br>= 7.4, <i>p</i> = 0.0378); Prior GI bleeding (OR =<br>15.5, <i>p</i> = 0.0002)                                                                                                                                                                                                                                                                                                                                                                                                                                                                                                                                                                                                                                                                                                                                                                                                                                                      |
| Sherwood<br>et al., 2015<br>[50] | 73 (65–78)                                                        | 8,591 (60)                                                       | Rivaroxaban<br>Warfarin   | AF <sup>a)</sup>                                | 14,236      | 2010-2011 | RCT (Rocket<br>AF Trial)           | GIB 684          | Anemia at baseline (HR = 1.70, 95% CI: 1.41–<br>2.04, <i>p</i> < 0.0001); Previous GI bleeding (HR =<br>2.11, 95% CI: 1.62–2.76, <i>p</i> < 0.0001); Long-<br>term ASA use at screening HR = 1.47, 95%<br>CI: 1.26–1.72, <i>p</i> < 0.0001); Age (for each<br>5-yr increase) (HR = 1.11, 95% CI: 1.06–1.17,<br><i>p</i> < 0.0001); Diastolic BP (for each 5 mmHg<br>decrease to < 80 mmHg) (HR = 1.10, 95% CI:<br>1.05–1.16, <i>p</i> = 0.0002); Smoking history (cur-<br>rent or former) (HR = 1.37, 95% CI: 1.16–1.62),<br><i>p</i> = 0.0002); History of sleep apnea (HR =<br>1.60, 95% CI: 1.22–2.10, <i>p</i> = 0.0007); PPI at<br>baseline (HR = 1.36, 95% CI: 1.12–1.65, <i>p</i> =<br>0.0018); Creatinine clearance (for each 5-U<br>decrease to < 60 mL/min) (HR = 1.06, 95%<br>CI: 1.01–1.12, <i>p</i> = 0.015); COPD (HR = 1.30,<br>95% CI: 1.05–1.61, <i>p</i> = 0.016); Male (HR =<br>1.21, 95% CI: 1.01–1.44, <i>p</i> = 0.037); Baseline<br>antiplatelet (other than ASA) (HR = 1.50, 95%<br>CI: 1.02–2.21, <i>p</i> = 0.039) |



Supplementary Table 1. Continued

| Reference                         | Age (yr),<br>Mean $\pm$ SD<br>(range)                     | Sex, male,<br>n (%)                                | Drug              | Population                                                        | Sample size | Time      | Study design                       | Number<br>of GIB | Risk factor                                                                                                                                                                                                                                                                                                         |
|-----------------------------------|-----------------------------------------------------------|----------------------------------------------------|-------------------|-------------------------------------------------------------------|-------------|-----------|------------------------------------|------------------|---------------------------------------------------------------------------------------------------------------------------------------------------------------------------------------------------------------------------------------------------------------------------------------------------------------------|
| Shimomura<br>et al., 2018<br>[52] | 69.4 $\pm$ 9.9                                            | 329 (64.8)                                         | Warfarin<br>DOACs | AF, Valve<br>replace-<br>ment or<br>valvu-<br>loplasty<br>history | 508         | 2001–2015 | Retrospec-<br>tive cohort<br>study | GIB 42           | PPI therapy (AHR = 0.52, 95% CI: 0.27–1.0, $p$ = 0.053); Chronic kidney disease (AHR = 6.7, 95% CI: 2.3–19.6, $p$ < 0.001); COPD (AHR = 4.0, 95% CI: 1.4–11.2, $p$ = 0.011); History of peptic ulcer disease (AHR = 1.8, 95% CI: 0.95–3.6, $p$ = 0.071); Liver cirrhosis (AHR = 5.6, 95% CI: 1.7–18.6, $p$ = 0.005) |
| Youn et al.,<br>2018 [51]         | Mean<br>Non-GPA<br>70.4<br>(18–99)<br>GPA 73.3<br>(22–96) | Male<br>Non-GPA<br>837 (48.8)<br>GPA 164<br>(45.6) | DOACs             | AF, VTE,<br>DVT, PE,<br>ACS Pro-<br>phylaxis<br>of DVT/<br>PTE    | 2,076       | 2008–2016 | Retrospec-<br>tive cohort<br>study | UGIB 30          | Age, 1-year increase (HR = 1.041, 95% CI: 1.000–1.083, $p$ = 0.048); Antiplatelet agent use (HR = 3.121, 95% CI: 1.265–7.702, $p$ = 0.014); History of peptic ulcer/UGIB (HR = 5.931, 95% CI: 2.504–14.049, $p$ < 0.001)                                                                                            |

ACS, acute coronary syndrome; ARR, adjust risk ratio; DVT, deep vein thrombosis; IRR, incidence risk ratio; PE, pulmonary embolism; RR, risk ratio.

<sup>a)</sup>The populations of 23 studies were only stroke patients.
