# Supplementary material for: Risk factors for anticoagulant-associated gastrointestinal hemorrhage: a systematic review and meta-analysis
Source: PubMed Central journal article supplement — Korean J Intern Med. 2023 Dec 8;39(1):77–85. doi: 10.3904/kjim.2023.098 (PMC10790055; doi:10.3904/kjim.2023.098), 2023-12-08
Supplement: kjim-2023-098-Supplementary-Table-3-4.pdf [file kjim-2023-098-Supplementary-Table-3-4.pdf]

**Supplementary Table 3. Risk of bias assessments using PROBUST for risk assessment model studies**

| Reference             | Year | Participants | Predictors | Outcome | Analysis | Total |
|-----------------------|------|--------------|------------|---------|----------|-------|
| Shimomura et al. [52] | 2017 | High         | Low        | Low     | Low      | High  |

PROBUST, Prediction Study Risk of Bias Assessment Tool.

**Supplementary Table 4. Risk of bias assessments using QUIPS for prognostic factor studies**

| Reference                   | Year | Study participation | Study attrition | Prognostic factor measurement | Outcome measurement | Study confounding | Statistical analysis and reporting |
|-----------------------------|------|---------------------|-----------------|-------------------------------|---------------------|-------------------|------------------------------------|
| Agudo-Fernández et al. [19] | 2021 | Low                 | Low             | Low                           | Low                 | Low               | Low                                |
| Fanning et al. [20]         | 2020 | Low                 | Low             | Low                           | Low                 | Low               | Low                                |
| Graham et al. [21]          | 2014 | Low                 | Low             | Moderate                      | Low                 | Low               | Low                                |
| Aisenberg et al. [22]       | 2018 | Low                 | Low             | Moderate                      | Low                 | Low               | Low                                |
| Chan et al. [23]            | 2015 | Low                 | Low             | Low                           | Low                 | Moderate          | Low                                |
| Chen et al. [24]            | 2014 | Low                 | Low             | Low                           | Low                 | Low               | Low                                |
| Coates et al. [25]          | 2021 | Low                 | Low             | Low                           | Low                 | Moderate          | Low                                |
| Delaney et al. [26]         | 2007 | Low                 | Low             | Low                           | Low                 | Low               | Low                                |
| Douros et al. [27]          | 2019 | Low                 | Low             | Low                           | Low                 | Low               | Low                                |
| Ferroni et al. [28]         | 2022 | Low                 | Low             | Moderate                      | Low                 | Low               | Low                                |
| Gandhi et al. [29]          | 2021 | Low                 | Low             | Low                           | Low                 | Low               | Low                                |
| Garcia et al. [30]          | 2019 | Low                 | Low             | Low                           | Low                 | Low               | Low                                |
| Holm et al. [31]            | 2020 | Low                 | Low             | Low                           | Low                 | Low               | Low                                |
| Holt et al. [32]            | 2021 | Low                 | Low             | Low                           | Low                 | Low               | Low                                |
| Kato et al. [33]            | 2016 | Low                 | Low             | Low                           | Low                 | Low               | Low                                |
| Kalil et al. [34]           | 2016 | Low                 | Low             | Low                           | Low                 | Low               | Low                                |
| Kolb et al. [35]            | 2018 | Low                 | Low             | Low                           | Low                 | Low               | Low                                |
| Lauffenburger et al. [36]   | 2015 | Low                 | Low             | Low                           | Low                 | Low               | Low                                |
| Lee et al. [37]             | 2021 | Low                 | Low             | Low                           | Moderate            | Low               | Low                                |
| Leonard et al. [38]         | 2016 | Low                 | Low             | Moderate                      | Moderate            | Moderate          | Low                                |
| Maruyama et al. [39]        | 2018 | Low                 | Low             | Moderate                      | Low                 | Moderate          | Low                                |
| Murata et al. [40]          | 2020 | Low                 | Low             | Low                           | Low                 | Moderate          | Low                                |
| Nantsupawat et al. [41]     | 2017 | Low                 | Low             | Moderate                      | Low                 | Moderate          | Low                                |
| Nawarawong et al. [42]      | 2018 | Low                 | Low             | Moderate                      | Low                 | Moderate          | Low                                |
| Olsen et al. [43]           | 2019 | Low                 | Low             | Low                           | Low                 | Low               | Low                                |
| Pham et al. [44]            | 2020 | Low                 | Low             | Low                           | Low                 | Low               | Low                                |
| Pourakari et al. [45]       | 2016 | Low                 | Low             | Low                           | Low                 | Low               | Low                                |
| Schauer et al. [46]         | 2005 | Low                 | Low             | Low                           | Low                 | Low               | Low                                |
| Sherid et al. [47]          | 2015 | Low                 | Low             | Low                           | Low                 | Low               | Low                                |
| Sherid et al. [48]          | 2014 | Low                 | Low             | Low                           | Low                 | Low               | Low                                |
| Sherid et al. [49]          | 2016 | Low                 | Low             | Low                           | Low                 | Low               | Low                                |
| Sherwood et al. [50]        | 2015 | Low                 | Low             | Moderate                      | Low                 | Low               | Low                                |
| Youn et al. [51]            | 2018 | Low                 | Low             | Low                           | Low                 | Low               | Low                                |

QUIPS, Quality in Prognosis Studies.
